# Supplementary material
Source: publisher figshare collection journal article supplement (https://acs.figshare.com/ndownloader/files/15344288)
Supplement: Supplementary file 1 [file 15344288]

***Electronic Supplementary Information (ESI)***

**Luminescent Vesicle and Lyotropic Liquid Crystal in Ethylammonium  
Nitrate from a Partially Amphiphilic Eu Complex**

Qingrun Li <sup>a</sup>, Sijing Yi <sup>b</sup>, Xiao Chen <sup>a,\*</sup>

*<sup>a</sup> Key Laboratory of Colloid and Interface Chemistry, Shandong University, Ministry of Education,  
Jinan, 250100, China*

*<sup>b</sup> College of Arts and Sciences, Shanxi Agricultural University, Taigu, 030801, China*

**\*Corresponding author: Xiao Chen**

**Address:** Key Laboratory of Colloid and Interface Chemistry, Shandong University, Ministry of Education, Jinan, 250100, China

**E-mail:** xchen@sdu.edu.cn.

**Tel.:** +86-531-88365420.

**Fax:** +86-531-88564464.

## 1. POM textures of [C<sub>12</sub>mim]Br aggregate in different phases

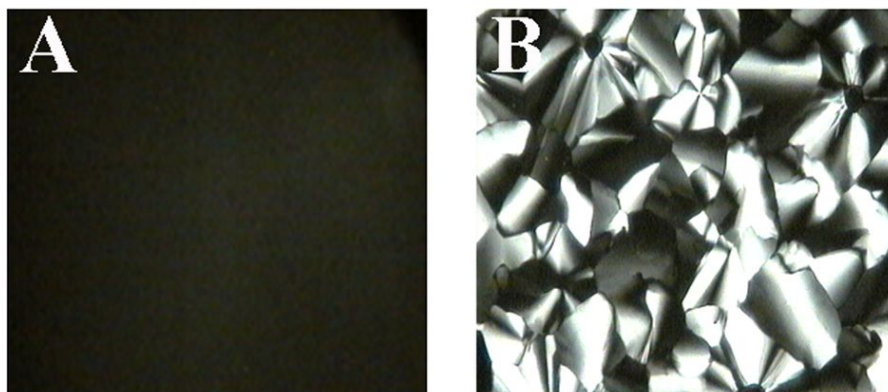

**Figure S1.** POM textures for [C<sub>12</sub>mim]Br aggregates at [C<sub>12</sub>mim]Br concentrations (wt%) of 50 (A) and 75 (B).

## 2. The luminescence decay curves and visual appearance of various Eu(III) aggregates

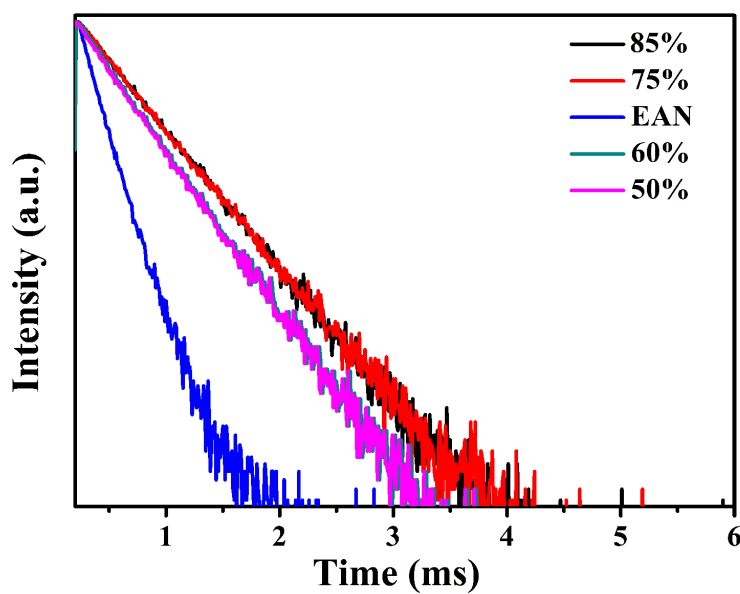

**Figure S2.** Luminescence decay curves of Eu(III) in aggregate samples and pure EAN under excitation at 340 nm and observed at 617 nm at room temperature.

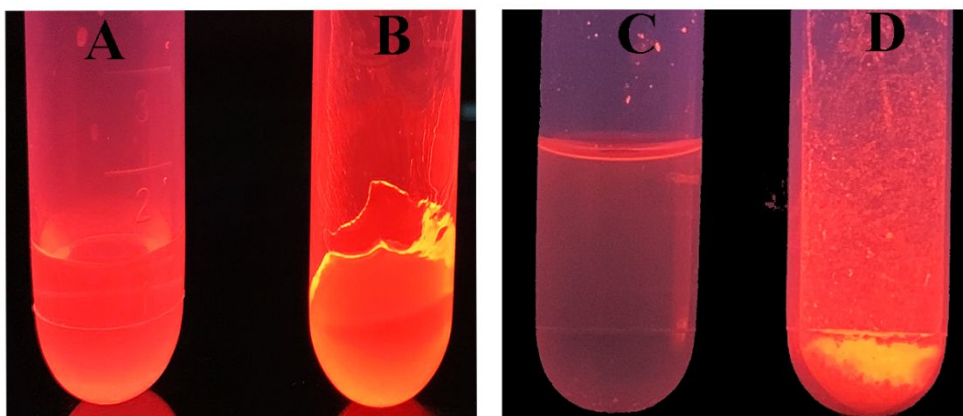

**Figure S3.** Visual images of luminescent Eu(III) in different status under UV light ( $\lambda_{\text{max}} = 365$  nm). (A) vesicle; (B) LLC; (C) EAN solution; (D) Eu(III) solid

### 3. Calculation of the radiative ( $k_r$ ) or nonradiative ( $k_{nr}$ ) rate constants and internal quantum efficiency ( $Q_{\text{in}}$ )

Because of its stable intensity, the  $^5D_0 \rightarrow ^7F_1$  transition can be taken as a reference for the calculation of internal quantum efficiency ( $Q_{\text{in}}$ ). On the basis of intensity parameters obtained from the emission spectra, the total radiative rate of  $^5D_0$  can be given by eq. (1),

$$k_r = \sum_{J=0}^4 k_{0 \rightarrow J} = k_{01} \sum_{J=0}^4 \left( \frac{S_{0J}}{S_{01}} \right) \left( \frac{\nu_{01}}{\nu_{0J}} \right) \quad (1)$$

where  $S_{0J}$  and  $\nu_{0J}$  were the integrated intensities and energy barycentres of  $^5D_0 \rightarrow ^7F_J$  ( $J = 0 \sim 4$ ) transitions in the emission curves, respectively.<sup>[1,2]</sup>  $k_{01}$  was the Einstein coefficient of spontaneous emission for  $^5D_0 \rightarrow ^7F_1$  transition and could be determined as  $\sim 50 \text{ s}^{-1}$  in air for solid samples.<sup>[3]</sup>

Based on the fitted lifetimes ( $\tau$ ), the total decay rate of  $^5D_0$  ( $k_{\text{tot}}$ ) could be calculated by eq. (2).<sup>[1,2]</sup>

$$k_{\text{tot}} = \frac{1}{\tau} = k_r + k_{nr} \quad (2)$$

Assuming that only nonradiative and radiative decay processes were involved in the depopulation of  $^5D_0$  state, the internal emission quantum efficiency ( $Q_{\text{in}}$ ) could be determined using the eq. (3).

$$Q = \frac{k_r}{k_r + k_{nr}} \quad (3)$$

## References

1. Shao, Y. F.; Yan, B.; Li, Q. P. Magnetic mesoporous silica nanosphere supported europium(III) tetrakis( $\beta$ -diketonate) complexes with ionic liquid compounds as linkers. *Eur. J. Inorg. Chem.* **2013**, 3, 381–387.
2. Yin, S. Y.; Sun, H.; Yan, Y.; Li, W.; Wu, L. X. Hydrogen-bonding-induced supramolecular liquid crystals and luminescent properties of europium-substituted polyoxometalate hybrids. *J. Phys. Chem. B* **2009**, 113, 2355–2364.
3. Hazenkamp, M. F.; Blasse, G. Rare-earth ions adsorbed onto porous glass: luminescence as a characterizing tool. *Chem. Mater.* **1990**, 2, 2105–110.
